# Supplementary material
Source: publisher figshare collection journal article supplement (https://acs.figshare.com/ndownloader/files/4394932)
Supplement: Supplementary file 1 [file 4394932]

# Supporting information

**Coordination Copolymerization mediated by  $\text{Zn}_4\text{O}(\text{CO}_2\text{R})_6$  Metal**

**Clusters: a balancing act between statistics and geometry**

**Kyoungmoo Koh, Antek G. Wong-Foy, and Adam J. Matzger\***

*Department of Chemistry, Macromolecular Science and Engineering, University of Michigan,  
Ann Arbor, Michigan 48109-1055, USA*

## Contents

- I.** TGA of UMCM-3, 4, 5 (S1-3)
- II.** X-ray crystallography of UMCM-3, 4 (S4-5)
- III.** PXRD data of UMCM-3, 4, 5 (S6-7)
- IV.** Gas sorption measurements for UMCM-3, 4, 5 (S8-13)
- V.** Quantification and characterization of PHT in UMCM-1 (S14)
- VI.** Microscope images of Nile red and Reichardt's dye incorporated in UMCM-1 (S15)

\*Author to whom correspondence may be addressed: matzger@umich.edu

### I. Thermal gravimetric analysis (TGA)

Measurements were performed on a TA Q50 TGA apparatus. Temperature was ramped from 25 °C to 600 °C at 2 °C/min under flow of N<sub>2</sub> gas.

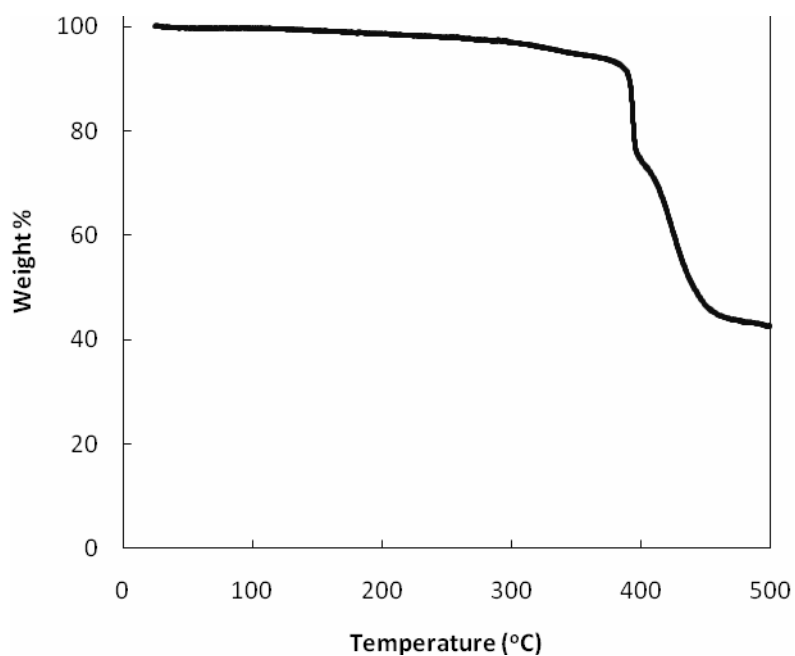

**Figure S1.** TGA trace of UMCM-3.

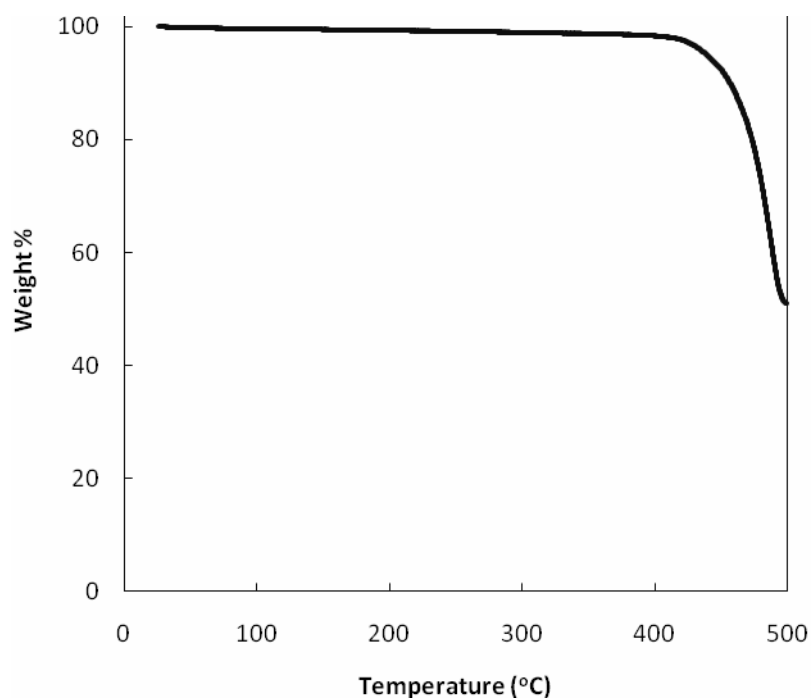

**Figure S2.** TGA trace of UMCM-4.

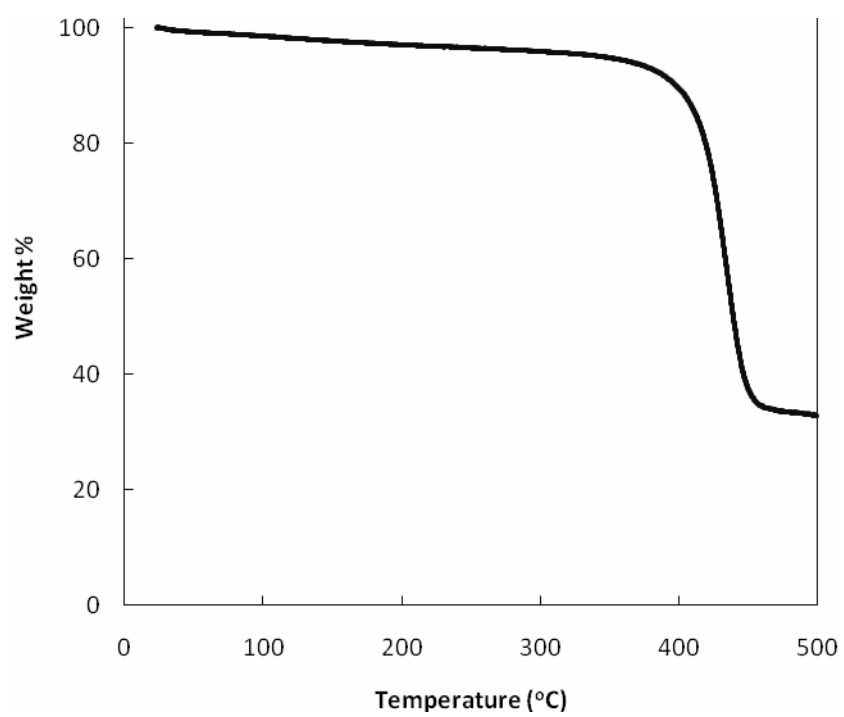

**Figure S3.** TGA trace of UMCM-5.

## II. X-ray crystallography of UMCM-3 and 4

### X-ray structure determination

X-ray diffraction data were collected for UMCM-3 and UMCM-4 on a Rigaku-Axis Spider diffractometer equipped with graphite monochromated CuK $\alpha$  radiation ( $\lambda = 1.54180 \text{ \AA}$ ). Crystals of UMCM-3 and UMCM-4 were immersed in CH<sub>2</sub>Cl<sub>2</sub> for one day followed by immersion in light mineral oil until data could be collected. Suitable crystals were mounted on MitiGen cryoloops using Paratone-N oil and cooled under a nitrogen gas stream at 95 K. Data were collected using the d\*TREK package in the CrystalClear software suite (v. 2.0, Rigaku 2009) to obtain overlapping  $\phi$  and  $\omega$  scans. Using the FS\_PROCESS package in CrystalClear, the raw intensity data were then reduced to  $F^2$  values with corrections for Lorentz, and polarization effects and empirical absorption corrections were applied as implemented by FS\_PROCESS. Decay of the crystals during data collection was negligible. The structures were solved by direct methods and refined by full-matrix least-squares refinement against all data using SHELXL-97<sup>1</sup> in the CrystalStructure (v. 4.0) software package. Thermal parameters for all non-hydrogen atoms were refined anisotropically except where noted. All hydrogen atoms were calculated at idealized positions (C-H = 0.93  $\text{\AA}$ ) and refined using a riding model with isotropic thermal parameters 1.2 times that of the attached carbon atom. UMCM-3 was solved in the cubic space group  $F43m$  (#216). Carbons C6, C7, C9, C10, C16, and C17 that contribute to the three benzene rings surrounding the central ring of the BTB linker were treated isotropically due to severe disorder. UMCM-4 was solved in the orthorhombic space group  $Pnma$  (#62). Attempts to locate and model the highly disordered solvent molecules in the pores were unsuccessful. Therefore the SQUEEZE<sup>2</sup> routine of PLATON was used to remove the diffraction contribution from these solvents to produce a set of solvent free diffraction intensities.

**Table S1.** Crystal data and structure refinement for UMCM-3 and UMCM-4

| Compound                            | UMCM-3                                      | UMCM-4                                      |
|-------------------------------------|---------------------------------------------|---------------------------------------------|
| Empirical formula                   | 'C99 H51 O32.50 S3 Zn10'                    | 'C33 H16 N O13 Zn4'                         |
| Formula weight                      | 2510.28                                     | 896.01                                      |
| Temperature                         | 95(2) K                                     | 95(2) K                                     |
| Wavelength                          | 1.54180                                     | 1.54180                                     |
| Crystal System                      | cubic                                       | orthorhombic                                |
| Space Group                         | <i>F</i> -43 <i>m</i> (#216)                | <i>Pnma</i> (#62)                           |
| Unit Cell Dimensions                | a = 44.3453(8) Å                            | a = 25.0573(5) Å                            |
|                                     | b = 44.3453(8) Å                            | b = 25.4805(5) Å                            |
|                                     | c = 44.3453(8) Å                            | c = 32.9266(6) Å                            |
|                                     | $\alpha = 90^\circ$                         | $\alpha = 90^\circ$                         |
|                                     | $\beta = 90^\circ$                          | $\beta = 90^\circ$                          |
|                                     | $\gamma = 90^\circ$                         | $\gamma = 90^\circ$                         |
| Volume                              | 87205(3) Å <sup>3</sup>                     | 21022.7(7) Å <sup>3</sup>                   |
| Z                                   | 8                                           | 8                                           |
| Density (calculated)                | 0.382 g/cm <sup>3</sup>                     | 0.566 g/cm <sup>3</sup>                     |
| Absorption coefficient              | 0.886 mm <sup>-1</sup>                      | 1.228 mm <sup>-1</sup>                      |
| F(000)                              | 10024                                       | 3560                                        |
| Crystal Size                        | 0.131 × 0.018 × 0.070 mm <sup>3</sup>       | 0.250 × 0.135 × 0.064 mm <sup>3</sup>       |
| Reflections collected/ unique       | 26757 / 6211                                | 57266 / 11262                               |
| R(int)                              | 0.0560                                      | 0.0809                                      |
| Data Completeness                   | 98.4 % (to theta = 71.59)                   | 99.3 % (to theta = 50.47)                   |
| Absorption correction               | Empirical from equivalents                  | Empirical from equivalents                  |
| Max. and min. transmission          | 1.0000 and 0.5051                           | 0.782 and 0.439                             |
| Refinement method                   | Full-matrix least-squares on F <sup>2</sup> | Full-matrix least-squares on F <sup>2</sup> |
| restraints/parameters               | 2/147                                       | 0/460                                       |
| GOF on F <sup>2</sup>               | 0.839                                       | 0.847                                       |
| Final R indices                     | R1 = 0.0411                                 | R1 = 0.0549                                 |
| [I>2sigma(I)] <sup>a,b</sup>        | wR2 = 0.0893                                | wR2 = 0.1508                                |
| R indices (all data) <sup>a,b</sup> | R1 = 0.1032<br>wR2 = 0.1059                 | R1 = 0.1002<br>wR2 = 0.1678                 |

<sup>a)</sup>  $wR2 = [\Sigma w(|F_o|^2 - |F_c|^2)] / [\Sigma w(F_o)^2]^{1/2}$ ,  $w = 1 / [\sigma^2(F_o^2) + (mP)^2 + nP]$  and  $P = [\max(F_o^2, 0) + 2F_c^2] / 3$  ( $m$  and  $n$  are constants);  $\sigma = [\Sigma [w(F_o^2 - F_c^2)^2] / (n - p)]^{1/2}$ .

$$^b) \mathbf{R1} = \Sigma \|F_o\| - \|F_c\| / \Sigma \|F_o\|$$

### III. PXRD data of UMCM-3, 4, 5

Powder X-ray diffraction was performed on a Rigaku R-Axis Spider diffractometer with an image plate detector and Cu K $\alpha$  radiation operating in transmission mode. The sample was rotated in  $\phi$  and oscillated in  $\omega$  to minimize preferred orientation.

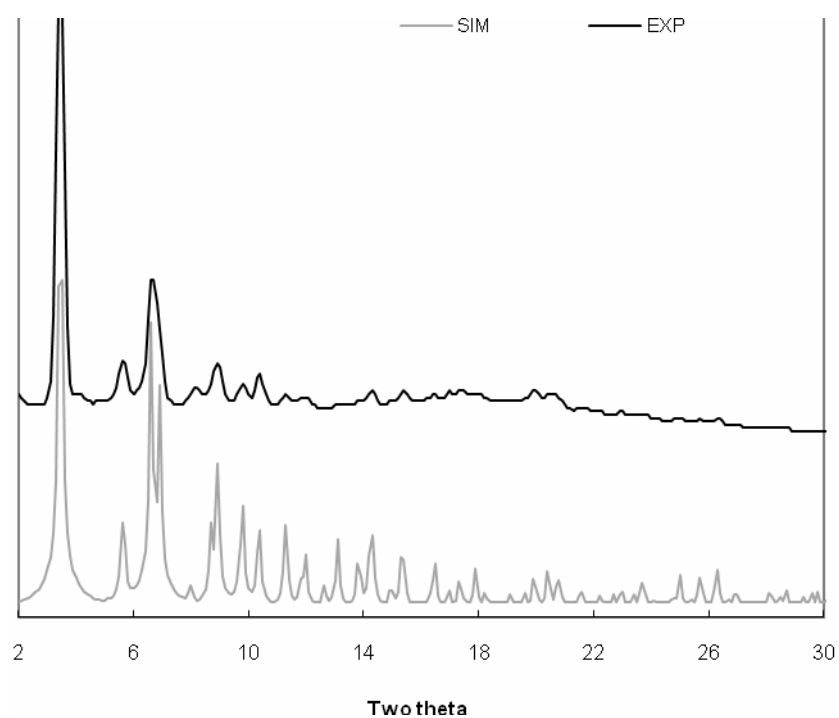

**Figure S7.** Powder XRD pattern of bulk UMCM-3 (black) and simulated pattern (grey).

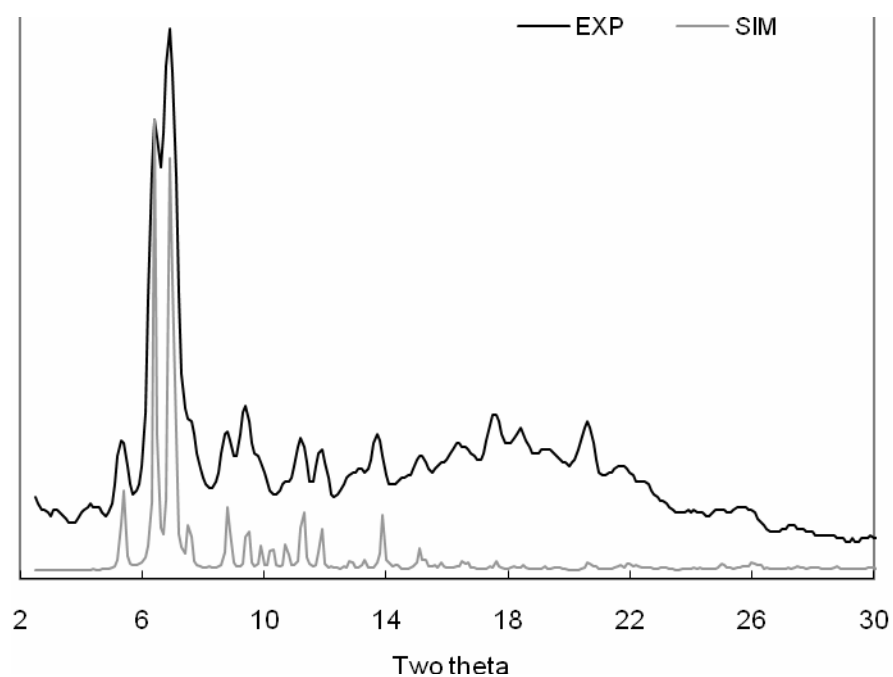

**Figure S8.** Powder XRD pattern of bulk UMCM-4 (black) and simulated pattern (grey).

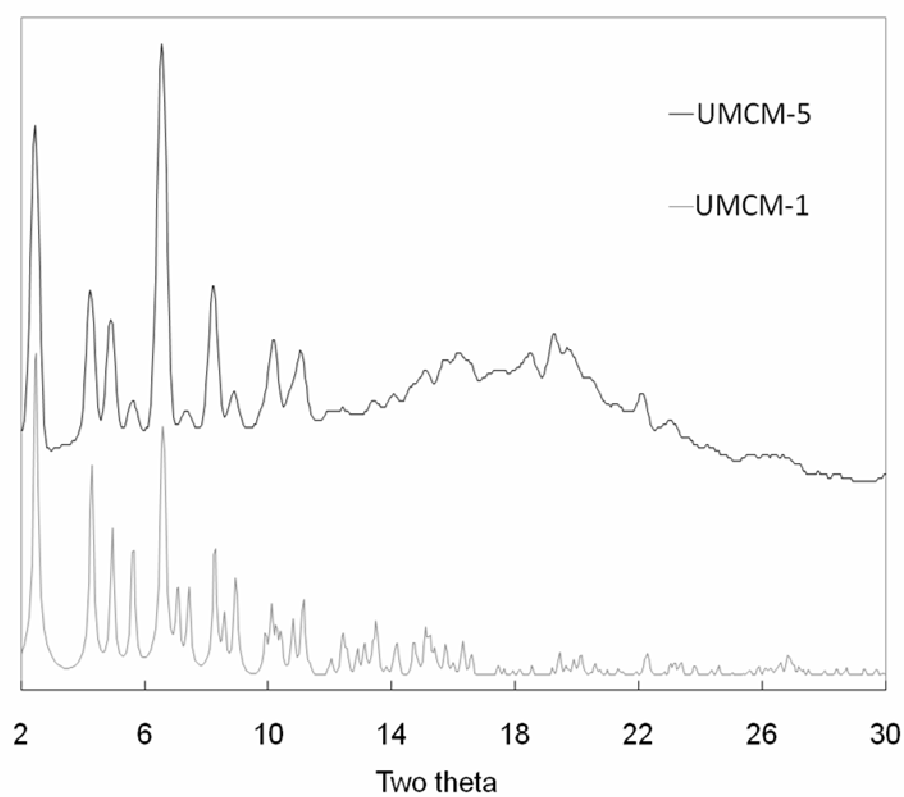

**Figure S9.** Powder XRD pattern of bulk UMCM-5 (black) and simulated UMCM-1 pattern (grey).



## **IV. Gas sorption measurements**

### **1. N<sub>2</sub> surface area**

N<sub>2</sub> adsorption/desorption isotherms were measured volumetrically at 77 K in the range  $1.00 \times 10^{-5} \leq P/P_0 \leq 1.00$  with an Autosorb-1C outfitted with the micropore option by Quantachrome Instruments (Boynton Beach, Florida USA), running version 1.2 of the ASWin software package. Ultra-high purity He (99.999%, for void volume determination) and N<sub>2</sub> (99.999%) were purchased from Cryogenic Gasses and used as received. The sample exchanged with CH<sub>2</sub>Cl<sub>2</sub> was charged into a sample cell and dried under vacuum (< 0.1 millitorr) at room temperature. The resulting mass of dried material in the cell was ~10 mg

### **2. Pore size distribution from Ar sorption at 87 K**

Argon sorption experiments were performed at 87 K in the range  $1.00 \times 10^{-4} \leq P/P_0 \leq 1.00$  with ultra-high purity Ar (99.999%) purchased from Cryogenic Gasses. Pore size distributions were calculated using the Non-linear Density Functional Theory (NLDFT) zeolite/silica equilibrium transition kernel for Ar adsorption at 87 K based on a cylindrical pore model as implemented in version 1.2 of the ASWin software package.

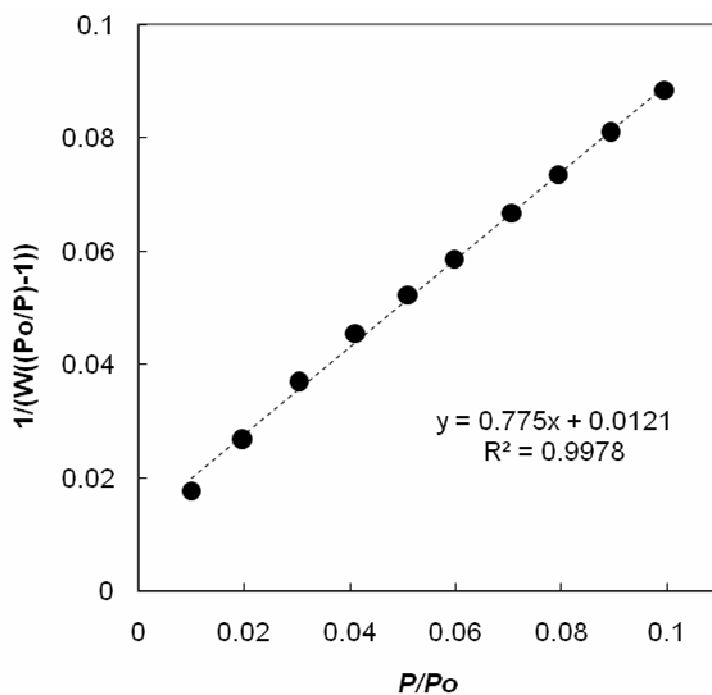

**Figure S10.** BET fit for the  $N_2$  adsorption isotherm of UMCM-3 (BET SA = 4430  $m^2/g$ ).

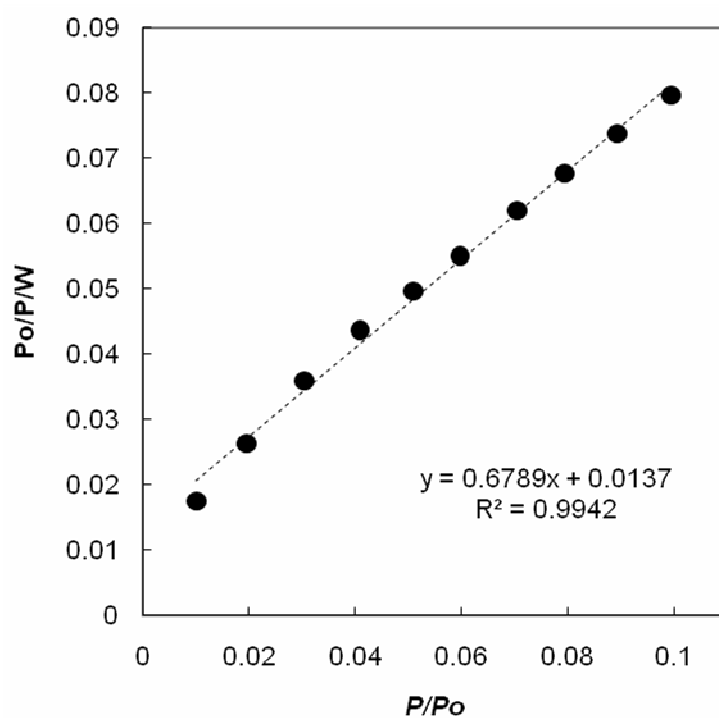

**Figure S11.** Langmuir fit for the  $N_2$  adsorption isotherm of UMCM-3. (Langmuir SA = 5130  $m^2/g$ ).

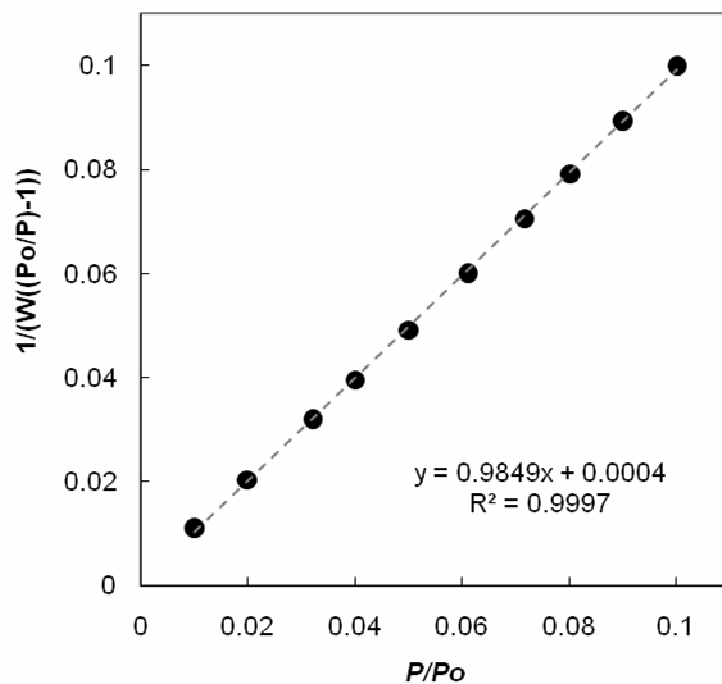

**Figure S12.** BET fit for the  $N_2$  adsorption isotherm of UMCM-4. (BET SA = 3530  $m^2/g$ ).

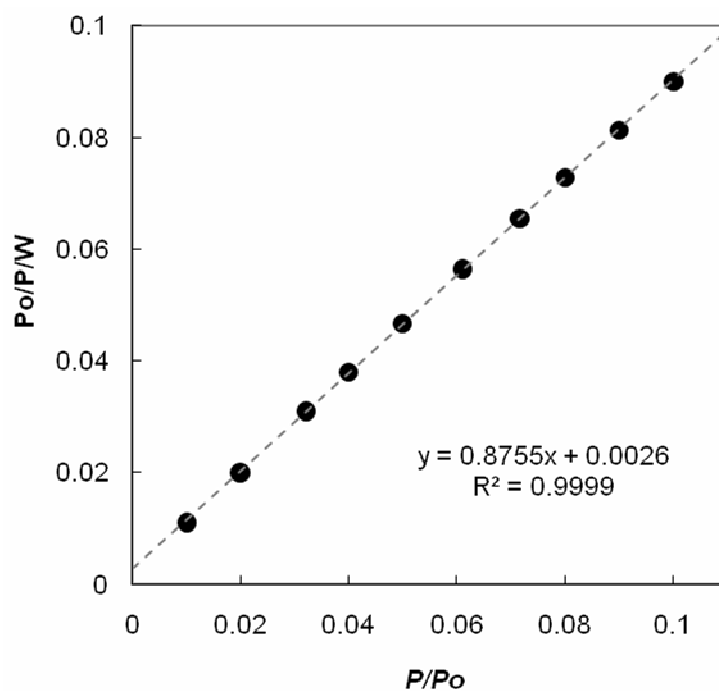

**Figure S13.** Langmuir fit for the  $N_2$  adsorption isotherm of UMCM-4. (Langmuir SA = 3980  $m^2/g$ ).

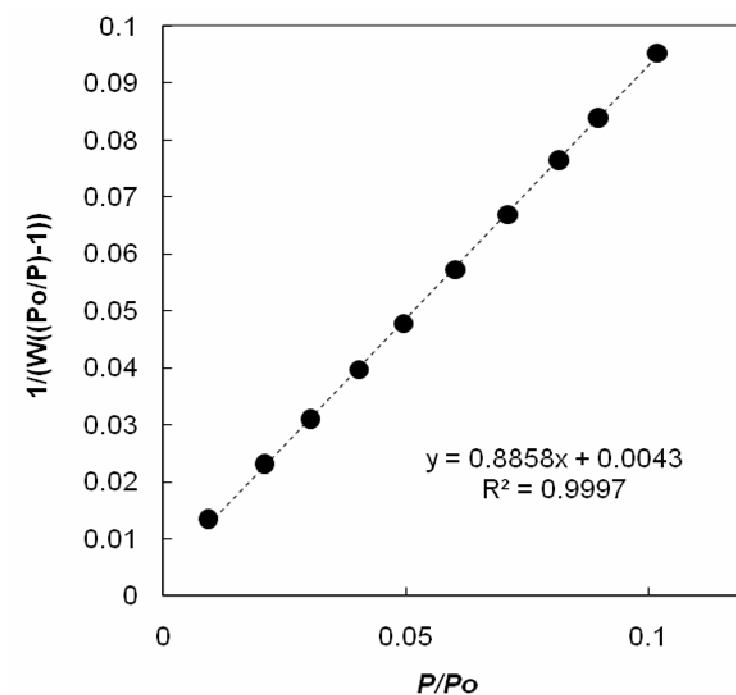

**Figure S14.** BET fit for the N<sub>2</sub> adsorption isotherm of UMCM-5 (BET SA = 3910 m<sup>2</sup>/g).

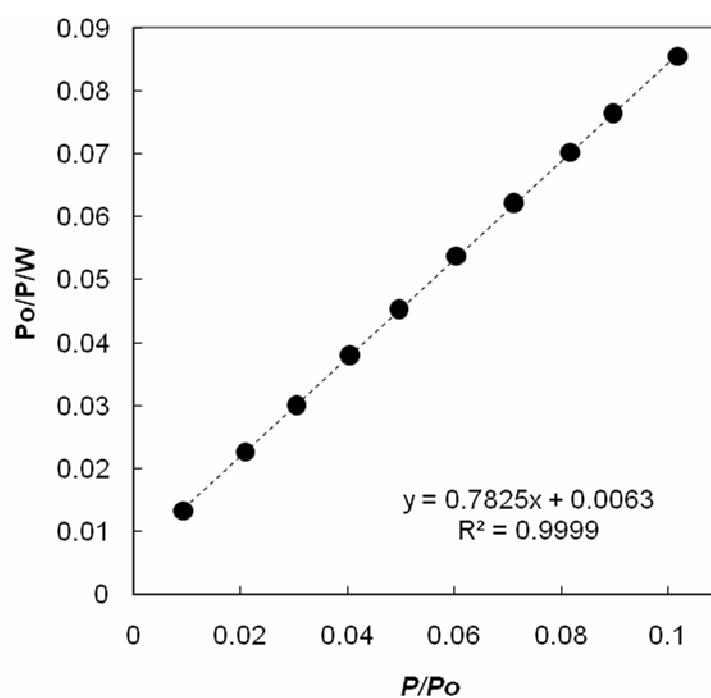

**Figure S15.** Langmuir fit for the N<sub>2</sub> adsorption isotherm of UMCM-5 (Langmuir SA = 4450 m<sup>2</sup>/g).

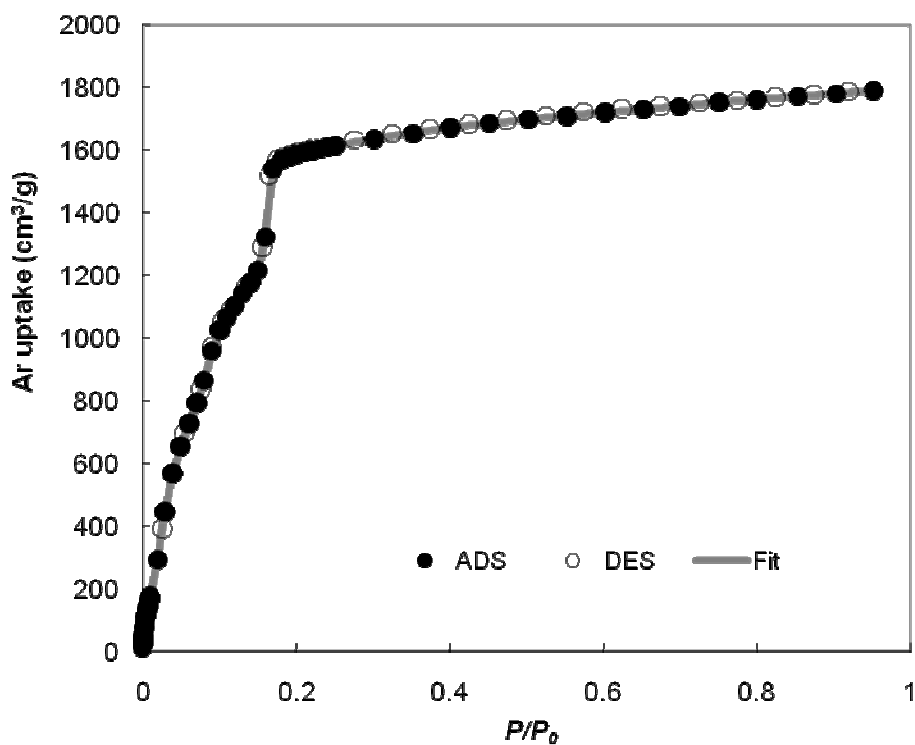

**Figure S16.** Ar adsorption/desorption isotherm at 87 K for UMCM-3 and the corresponding NLDFT fit base on a cylindrical pore model.

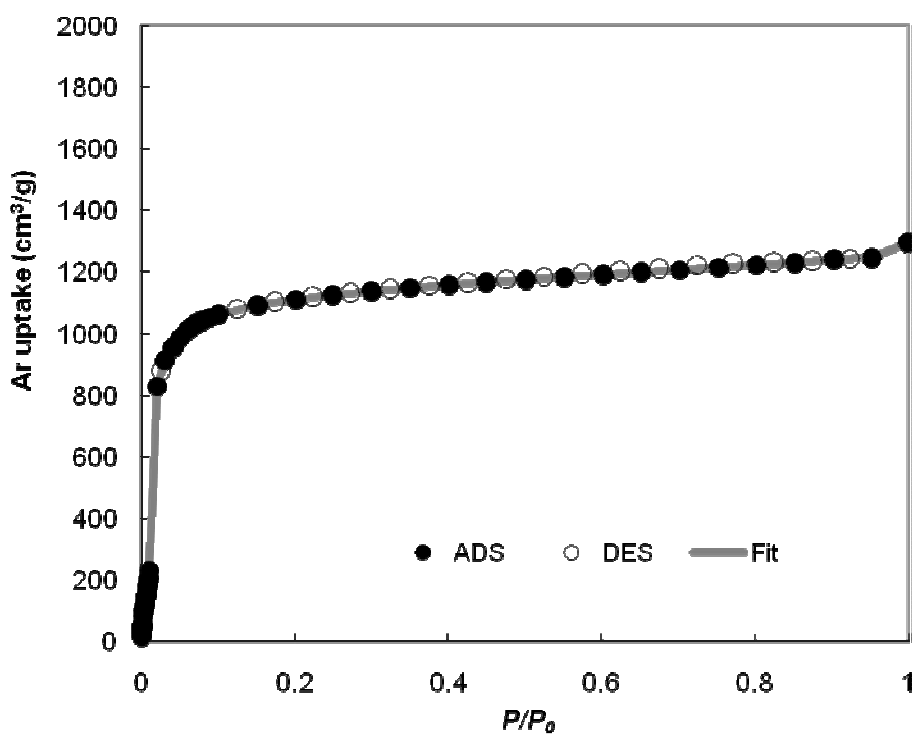

**Figure S17.** Ar adsorption/desorption isotherm at 87 K for UMCM-4 and the corresponding NLDFT fit base on a cylindrical pore model.

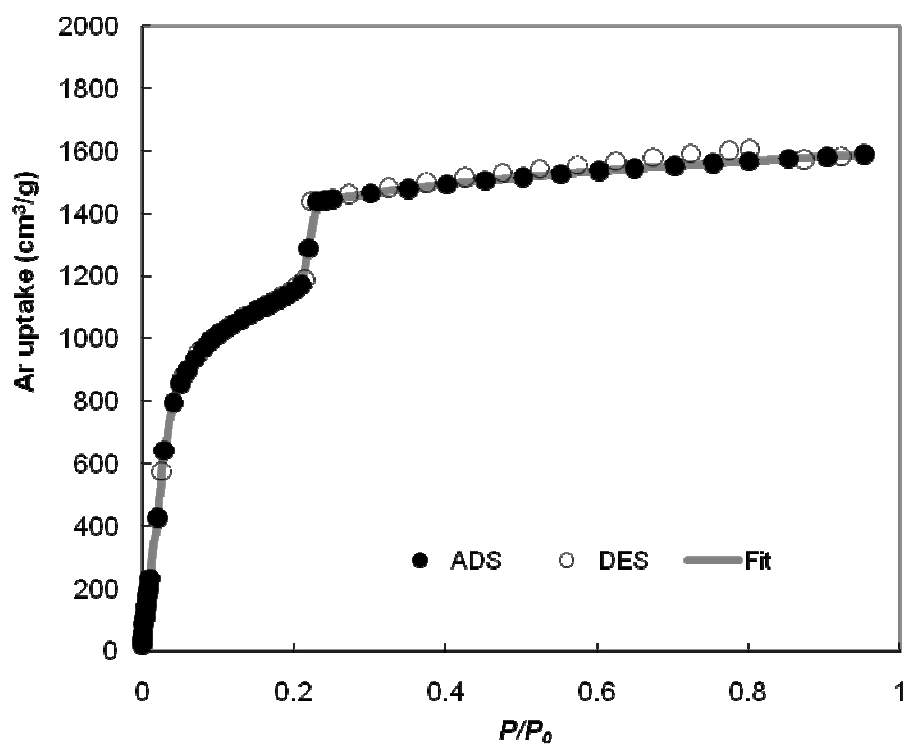

**Figure S18.** Ar adsorption/desorption isotherm at 87 K for UCMCM-5 and the corresponding NLDFT fit base on a cylindrical pore model.

## V. Quantification and characterization of PHT in UMCM-1.

A 1.0 M NaOH solution (1.37 g) was added to 1.20 mg of the PHT/UMCM-1 inclusion complex to decompose the UMCM-1 framework. The polymer was extracted with 0.97 g of chlorobenzene. The resulting chlorobenzene solution was washed with H<sub>2</sub>O (2 × 1 mL) and the amount of PHT was quantified by UV-Vis spectroscopy and determined to be 40.6 mg/g. The chlorobenzene solvent was removed under vacuum and the polymer obtained was dissolved in tetrahydrofuran (THF) and characterized by a gel permeation chromatographic (GPC) analysis on a Waters system equipped with three columns (Waters, styragel HT) and a UV detector. THF was used as an eluent at a flow rate of 1 mL/min. Polystyrene standards were used to calibrate the GPC system. The results are shown in Table S1.

**Table S2.** Molecular weight ( $M_n$ ) and polydispersity index (PDI) for PHT

|               | $M_n$ | PDI  |
|---------------|-------|------|
| PHT           | 21700 | 2.18 |
| PHT in UMCM-1 | 17500 | 1.75 |

## VI. Microscope images of Nile red and Reichardt's dye incorporated in UMCM-1

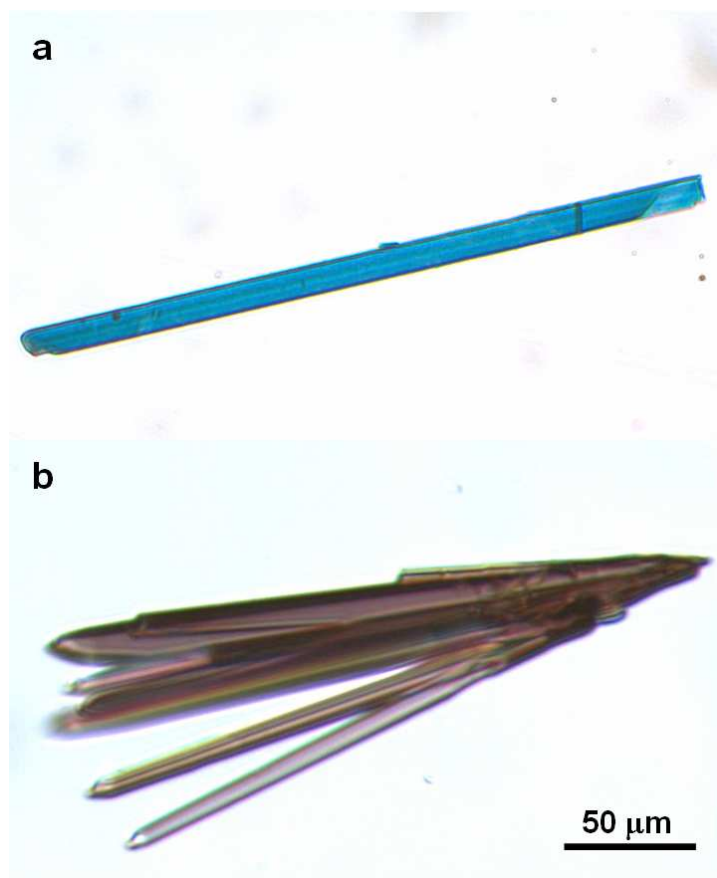

**Figure S19.** Microscope images of Nile red (a) and Reichardt's dye (b) incorporated UMCM-1 ( $\text{CH}_2\text{Cl}_2$ ).

---

<sup>1</sup> a) G. M. Sheldrick, *SHELXS '97 and SHELXL '97*. (University of Göttingen, Germany, **997**). b) Sheldrick, G.M., *Acta Cryst. A* **64**, **2008**, 112-122.

<sup>2</sup> A. L. Spek, *PLATON, A Multipurpose Crystallographic Tool*, (Utrecht University, Utrecht, The Netherlands, **2005**).
